# Supplementary material for: Reducing hospital-acquired infections and improving the rational use of antibiotics in a developing country: an effectiveness study
Source: PubMed Central journal article supplement — Arch Dis Child. 2014 Dec 10;100(5):454–9. doi: 10.1136/archdischild-2014-307297 (PMC4413864; doi:10.1136/archdischild-2014-307297), 2014-12-10
Supplement: archdischild-2014-307297-s1.pdf [file archdischild-2014-307297-s1.pdf]

## Web-appendix

Table 1. Criteria for differentiation between true pathogens and contaminants

|                                          | True pathogens                                                                                                                                                                                                                                                                                                                                                                                                                                                                                     | Potential contaminants                                                                                                                                                                                                                                           |
|------------------------------------------|----------------------------------------------------------------------------------------------------------------------------------------------------------------------------------------------------------------------------------------------------------------------------------------------------------------------------------------------------------------------------------------------------------------------------------------------------------------------------------------------------|------------------------------------------------------------------------------------------------------------------------------------------------------------------------------------------------------------------------------------------------------------------|
| Types of organism isolated on culture    | <i>Staphylococcus aureus</i> ,<br><i>Streptococcus pneumoniae</i> ,<br><i>Escherichia coli</i> and other Enterobacteriaceae, <i>Pseudomonas aeruginosa</i> , <i>Candida albicans</i> ,<br><i>Streptococcus pyogenes</i> ,<br><i>Streptococcus agalactiae</i> , <i>Listeria monocytogenes</i> , <i>Neisseria meningitidis</i> , <i>Neisseria gonorrhoeae</i> ,<br><i>Haemophilus influenzae</i> , <i>Bacteroides fragilis</i> group, all <i>Candida</i> species, and <i>Cryptococcus neoformans</i> | Coagulase-negative staphylococci,<br><i>Corynebacterium</i> species,<br><i>Bacillus</i> species other than <i>Bacillus anthracis</i> ,<br><i>Propionibacterium</i> species, <i>Micrococcus</i> species, <i>viridians</i> group streptococci, <i>Diphtheroids</i> |
| Time to culture positivity               | ≤ 5 days                                                                                                                                                                                                                                                                                                                                                                                                                                                                                           | > 5 days                                                                                                                                                                                                                                                         |
| Clinical signs and symptoms of infection | General - fever or other signs of sepsis syndrome including hypothermia (temperature <36°C), leukocyte counts of < 4,000 or > 20,000 leukocytes/μl, hypotension<br>Specific – new onset of cough or respiratory distress, new radiographic changes of consolidation on chest x-ray, leukocytes in urine, new onset of diarrhea                                                                                                                                                                     | No signs or symptoms of obvious infection                                                                                                                                                                                                                        |
| Number of positive culture sites         | When the same organism grows at the multiple culture sets                                                                                                                                                                                                                                                                                                                                                                                                                                          | When the different organism grows at the same culture set                                                                                                                                                                                                        |

Table 2. Nosocomial infections according to the ward the patient was located in the pre-and-post intervention periods

| Type of infections          | PICU<br>(n=509 patients) |          |                |      | Infectious ward<br>(n=916 patients) |          |                |      | Non-infectious ward<br>(n=1221 patients) |          |                |      |
|-----------------------------|--------------------------|----------|----------------|------|-------------------------------------|----------|----------------|------|------------------------------------------|----------|----------------|------|
|                             | Patients n (%)           |          | Episodes of NI |      | Patients n (%)                      |          | Episodes of NI |      | Patients n (%)                           |          | Episodes of NI |      |
|                             | Pre                      | Post     | Pre            | Post | Pre                                 | Post     | Pre            | Post | Pre                                      | Post     | Pre            | Post |
| Culture-positive BSI        | 58 (11.4)                | 29 (5.7) | 62             | 29   | 43 (4.7)                            | 18 (2)   | 43             | 18   | 16 (1.3)                                 | 6 (0.5)  | 16             | 6    |
| Culture-negative likely BSI | 9 (1.8)                  | 4 (0.8)  | 9              | 4    | 19 (2.1)                            | 17 (1.8) | 19             | 17   | 22 (1.7)                                 | 18 (1.5) | 22             | 18   |
| VAP/pneumonia               | 32 (6.3)                 | 5 (1)    | 32             | 5    | 4 (0.4)                             | 0        | 4              | 0    | 3 (0.2)                                  | 1 (0.08) | 3              | 1    |
| CAUTI/UTI                   | 20 (3.9)                 | 6 (1.2)  | 20             | 6    | 22 (2.4)                            | 5 (0.5)  | 22             | 5    | 23 (1.9)                                 | 3 (0.2)  | 23             | 3    |
| SSI                         | 4 (0.8)                  | 4 (0.8)  | 4              | 4    | 3 (0.3)                             | 1 (0.1)  | 3              | 1    | 12 (1)                                   | 1 (0.08) | 12             | 1    |
| GI                          | 10 (2)                   | 0        | 10             | 0    | 8 (0.9)                             | 1 (0.1)  | 8              | 1    | 4 (0.3)                                  | 2 (0.1)  | 4              | 2    |
| Phlebitis                   | 13 (2.6)                 | 0        | 13             | 0    | 10 (1.1)                            | 3 (0.3)  | 10             | 3    | 8 (0.7)                                  | 1 (0.08) | 8              | 1    |
| URTI                        | 0                        | 0        | 0              | 0    | 6 (0.6)                             | 0        | 6              | 0    | 7 (0.6)                                  | 0        | 7              | 0    |
| Total                       | 103                      | 48       | 150            | 48   | 93                                  | 44       | 115            | 45   | 81                                       | 31       | 95             | 32   |

CI=confidence interval, NI=nosocomial infection, VAP=ventilator associated pneumonia, CAUTI=catheter-associated urinary tract infection, UTI=nosocomial urinary tract infection, SSI=surgical site infection, GI=nosocomial gastrointestinal, URTI=nosocomial upper respiratory tract infection

<sup>a</sup> Number of patients with nosocomial infection (site-specific number)

<sup>b</sup> Percentage of patients with nosocomial infection (site-specific incidence)

<sup>c</sup> Number of nosocomial infections

<sup>d</sup> Percentage of total number of nosocomial infections (relative percentage)

Table 3. Pathogens isolated in patients with nosocomial bloodstream infections

|                                            | PICU          |                | Infectious ward |                | Non-infectious ward |               |
|--------------------------------------------|---------------|----------------|-----------------|----------------|---------------------|---------------|
|                                            | Pre<br>(n=62) | Post<br>(n=29) | Pre<br>(n=43)   | Post<br>(n=18) | Pre<br>(n=16)       | Post<br>(n=6) |
| <i>P. aeruginosa</i>                       | 35            | 14             | 30              | 4              | 6                   | 4             |
| <i>K. pneumoniae</i>                       | 4             | -              | 2               | 2              | 1                   | -             |
| <i>S. marcescens</i>                       | 8             | 1              | -               | -              | 2                   | -             |
| <i>B. cepacia</i>                          | -             | 3              | -               | 9              | -                   | 2             |
| Coagulase-negative<br>staphylococci (CONS) | 6             | 1              | 5               | 3              | 4                   | -             |
| <i>E. coli</i>                             | -             | -              | -               | -              | 1                   | -             |
| <i>Enterobacter</i> spp.                   | 2             | -              | 3               | -              | 1                   | -             |
| <i>Acinetobacter</i> spp.                  | 3             | 3              | 1               | -              | -                   | -             |
| <i>Enterococcus</i> spp.                   | 1             | -              | -               | -              | -                   | -             |
| <i>Pseudomonas</i> spp.                    | 2             | 2              | 1               | -              | 1                   | -             |
| <i>Klebsiella</i> spp.                     | -             | -              | 1               | -              | -                   | -             |
| <i>C. albicans</i>                         | 1             | 3              | -               | -              | -                   | -             |
| <i>Candida</i> spp.                        | -             | 2              | -               | -              | -                   | -             |

Table 4. Pathogens isolated in patients with nosocomial pneumonia including ventilator-associated pneumonia

|                      | PICU          |               | Infectious ward |               | Non-infectious ward |               |
|----------------------|---------------|---------------|-----------------|---------------|---------------------|---------------|
|                      | Pre<br>(n=32) | Post<br>(n=5) | Pre<br>(n=4)    | Post<br>(n=0) | Pre<br>(n=3)        | Post<br>(n=1) |
| <i>P. aeruginosa</i> | 12            | 1             | -               | -             | -                   | -             |
| <i>K. pneumoniae</i> | 6             | -             | -               | -             | -                   | -             |
| CONS                 | 2             | 2             | 1               | -             | -                   | -             |
| <i>S. aureus</i>     | -             | -             | -               | -             | 1                   | -             |
| No bacteria*         | 12            | 2             | 3               | -             | 2                   | 1             |

\*Clinical manifestation and chest x-ray only

Table 5. Pathogens isolated in patients with nosocomial urinary tract infection (UTI) including catheter-associated UTI

|                          | PICU          |               | Infectious ward |               | Non-infectious ward |               |
|--------------------------|---------------|---------------|-----------------|---------------|---------------------|---------------|
|                          | Pre<br>(n=20) | Post<br>(n=6) | Pre<br>(n=22)   | Post<br>(n=5) | Pre<br>(n=23)       | Post<br>(n=3) |
| <i>P. aeruginosa</i>     | 1             | 2             | 2               | 1             | 6                   | -             |
| <i>K. pneumoniae</i>     | 3             | -             | 3               | 2             | 0                   | 2             |
| <i>S. marcescens</i>     | -             | -             | -               | -             | 1                   | -             |
| <i>Enterococcus</i> spp. | 1             | -             | -               | -             | -                   | -             |
| CONS                     | -             | -             | 2               | 1             | 2                   | -             |
| <i>Candida</i> spp.      | 4             | -             | -               | -             | -                   | -             |
| <i>E. coli</i>           | 1             | -             | 1               | -             | -                   | -             |
| <i>Enterobacter</i> spp. | -             | -             | -               | -             | 4                   | -             |
| <i>C. neoformans</i>     | -             | 1             | -               | -             | -                   | -             |
| <i>Pseudomonas</i> spp.  | -             | -             | 1               | -             | -                   | -             |
| <i>Klebsiella</i> spp.   | -             | -             | -               | -             | 1                   | -             |
| <i>C. albicans</i>       | 2             | 3             | -               | -             | 3                   | -             |
| No bacteria*             | 8             | -             | 13              | 1             | 6                   | 1             |

\*Clinical manifestation and positive dipstick only

Table 6. Multivariable analysis of the factors affecting intervention to reduce nosocomial infections

| A multifaceted intervention    | OR (95%CI)         | p value |
|--------------------------------|--------------------|---------|
| Crude OR                       | 0.32 (0.26 – 0.41) | < 0.001 |
| Adjusted for age               | 0.32 (0.25 – 0.39) | < 0.001 |
| Adjusted for gender            | 0.32 (0.26 – 0.41) | < 0.001 |
| Adjusted for syndrome          | 0.31 (0.25 – 0.39) | < 0.001 |
| Adjusted for immunocompromized | 0.33 (0.26 – 0.41) | < 0.001 |
| Adjusted for referral status   | 0.32 (0.25 – 0.40) | < 0.001 |
| Adjusted for sepsis            | 0.32 (0.26 – 0.41) | < 0.001 |
| Adjusted for malnutrition      | 0.32 (0.25 – 0.40) | < 0.001 |
| Adjusted for bacteraemia       | 0.31 (0.23 – 0.41) | < 0.001 |
| Adjusted for all above         | 0.28 (0.21 – 0.38) | < 0.001 |

Table 7. Multivariable analysis of the factors affecting intervention to reduce mortality

| A multifaceted intervention    | OR (95%CI)         | p value |
|--------------------------------|--------------------|---------|
| Crude OR                       | 0.76 (0.58 – 0.98) | 0.04    |
| Adjusted for age               | 0.74 (0.56 – 0.97) | 0.03    |
| Adjusted for gender            | 0.76 (0.58 – 0.98) | 0.04    |
| Adjusted for syndrome          | 0.73 (0.56 – 0.96) | 0.02    |
| Adjusted for immunocompromized | 0.76 (0.58 – 0.99) | 0.04    |
| Adjusted for referral status   | 0.75 (0.53 – 0.98) | 0.04    |
| Adjusted for sepsis            | 0.76 (0.58 – 0.98) | 0.04    |
| Adjusted for malnutrition      | 0.75 (0.57 – 0.98) | 0.03    |
| Adjusted for all above         | 0.72 (0.54 – 0.94) | 0.02    |
